# Supplementary material for: First Behavioural Characterisation of a Knockout Mouse Model for the Transforming Growth Factor (TGF)-β Superfamily Cytokine, MIC-1/GDF15
Source: PLoS One. 2017 Jan 12;12(1):e0168416. doi: 10.1371/journal.pone.0168416 (PMC5231335; doi:10.1371/journal.pone.0168416)
Supplement: S1 File — All processed raw data of the various behavioural tests carried out are listed in the Excel file. (XLSX) [file pone.0168416.s001.xlsx]

## Sheet: Final Data Sheet
Test	Animal	Treatment	Genotype	Sex	EPM_Distance (cm)	EPM_Closed Arms : entries	EPM_Closed Arms : time	EPM_Open Arm : entries	EPM_Open Arm : time	EPM_Open Arm : distance	EPM_Total Arms : entries	EPM_Total Arms : time	EPM_Total Arms : distance	EPM_Open Arm time ratio: including C	EPM_Open Arm time ratio: exc C	EPM_Open arm entry ratio	OF_Distance_1	OF_Distance_2	OF_Distance_3	OF_Distance_4	OF_Distance_5	OF_Distance_6	OF_TOTALdistance	OF_Peri_Distance_1	OF_Peri_Distance_2	OF_Peri_Distance_3	OF_Peri_Distance_4	OF_Peri_Distance_5	OF_Peri_Distance_6	OF_PeriTTL_Dist	OF_Cent_Distance_1	OF_Cent_Distance_2	OF_Cent_Distance_3	OF_Cent_Distance_4	OF_Cent_Distance_5	OF_Cent_Distance_6	OF_CentTTL_Dist	OF_Ratio_Distance	OF_Time in Peri	OF_Time in Cent	OF_Ratio_Time	OF_Total Rearing Freq	OF_Total Grooming Freq	Ymaze_Spont Alt [n]	Ymaze_Total entries	Ymaze_% Spont Alt	SI_Rearing : Freq	SI_Rearing : time	SI_Allo-grooming : Freq
7	21110	COHORT A	WT	Female	1513	20	172.9	11	54.6	3.824	28	236.8	12.953	18.2	23.0574	39.2857	1468.86	1128.42	714.323	539.5	574.119	499.62	4924.85	1194.83	787.393	477.802	405.108	421.562	296.452	3583.15	274.026	341.031	236.521	134.392	152.556	203.168	1341.69	27.2434	1528.3	271.7	15.0944	294	2285	16	28	61.5385	12	8	0
10	21145	COHORT A	WT	Female	1032.5	22	213.8	4	4.9	0.025	24	231.3	8.381	1.63333	2.11846	16.6667	1228.31	743.801	782.146	924.165	786.589	754.473	5219.49	996.587	610.682	584.701	668.726	552.17	508.001	3920.87	231.726	133.12	197.446	255.44	234.419	246.472	1298.62	24.8802	1606.6	193.4	10.7444	233	2543	11	29	40.7407	15	7.3	0
11	21153	COHORT A	WT	Female	873.2	15	181.3	8	19.2	0.126	23	212	7.189	6.4	9.0566	34.7826	1258.03	1025.4	970.897	981.454	758.75	856.666	5851.19	1001.2	726.514	686.606	577.527	488.957	549.329	4030.13	256.826	298.883	284.291	403.926	269.793	307.337	1821.06	31.1228	1405.8	394.2	21.9	207	2218	26	41	66.6667	14	8.7	0
11	21117	COHORT B	WT	Female	1108.3	23	208.7	3	4.7	0	24	227.6	9.298	1.56667	2.06503	12.5	821.37	504.775	453.606	476.705	353.97	466.632	3077.06	797.907	457.001	389.642	379.065	285.081	385.335	2694.03	23.4631	47.7741	63.9635	97.6403	68.8887	81.2971	383.027	12.4478	1693.7	106.3	5.90556	98	2022	12	24	54.5455	12	9.6	0
19	21124	COHORT B	WT	Female	1152.5	21	192.9	6	24.5	0.55	27	225.2	9.292	8.16667	10.8792	22.2222	1082.23	752.512	670.725	701.767	488.199	643.539	4338.97	890.039	602.044	549.296	569.577	457.714	567.974	3636.64	192.192	150.468	121.43	132.19	30.4852	75.5655	702.33	16.1866	1642.3	157.7	8.76111	190	2149	10	20	55.5556	18	10.1	4
20	21142	COHORT B	WT	Female	993.4	21	187.9	5	18.2	0.368	23	216	8.318	6.06667	8.42593	21.7391	734.14	803.351	624.127	728.459	809.927	477.09	4177.09	698.9	633.149	559.067	567.921	564.984	325.759	3349.78	35.2396	170.202	65.0602	160.538	244.944	151.332	827.315	19.806	1674.8	125.2	6.95556	207	2188	28	40	73.6842	15	9	1
17	21154	COHORT B	WT	Female	717.5	13	240.2	3	8.6	0.301	15	255.6	6.154	2.86667	3.36463	20	405.349	359.407	461.425	278.418	111.534	332.629	1948.76	390.487	326.76	415.83	221.8	111.534	271.166	1737.58	14.8624	32.6476	45.5951	56.6173	0	61.4633	211.186	10.8369	1771.9	28.1	1.56111	119	1744	6	16	42.8571	30	22.7	0
14	21166	COHORT B	WT	Female	1069.6	18	223.9	3	10.3	0.172	20	243.5	9.425	3.43333	4.22998	15	1166.57	662.679	917.35	825.393	625.249	540.495	4737.74	915.032	475.301	743.899	614.921	489.267	420.979	3659.4	251.538	187.378	173.45	210.472	135.982	119.516	1078.34	22.7606	1654.4	145.6	8.08889	157	2162	11	35	33.3333	24	11.7	0
15	21169	COHORT B	WT	Female	1422.6	26	189.4	5	17.1	0.647	30	213.7	12.026	5.7	8.00187	16.6667	1160.97	784.196	598.999	416.287	423.509	573.501	3957.46	911.037	573.731	421.352	341.456	369.912	484.59	3102.08	249.935	210.465	177.646	74.8309	53.5976	88.9115	855.386	21.6145	1662.2	137.8	7.65556	235	2032	23	40	60.5263	23	9.4	0
11	21123	COHORT C	WT	Female	1375.7	20	174.2	7	53.4	2.801	29	234.8	11.577	17.8	22.7428	24.1379	1425.42	1066.62	760.447	867.89	625.83	730.477	5476.69	1286.49	861.863	623.158	757.027	402.563	580.925	4512.03	138.931	204.76	137.289	110.864	223.267	149.552	964.663	17.614	1654.5	145.5	8.08333	531	2512	16	60	27.5862	10	5.2	1
19	21143	COHORT C	WT	Female	1264.1	18	172.3	9	53.5	3.027	23	232.8	11.02	17.8333	22.9811	39.1304	580.778	429.564	349.829	508.801	691.846	346.996	2907.81	556.7	360.976	234.425	369.267	545.507	281.124	2348	24.0783	68.5878	115.404	139.534	146.339	65.8719	559.815	19.2521	1698.7	101.3	5.62778	112	1871	14	25	60.8696	7	5.1	6
18	21144	COHORT C	WT	Female	1183.1	19	158.9	10	57.9	1.288	27	220.2	9.822	19.3	26.2943	37.037	1116.63	590.135	486.348	769.3	731.888	641.769	4336.07	1043.84	524.931	380.053	660.729	635.322	541.463	3786.33	72.7936	65.2041	106.294	108.57	96.5662	100.306	549.735	12.6782	1664.5	135.5	7.52778	122	2206	16	29	59.2593	4	3	0
15	21158	COHORT C	WT	Female	1155.1	19	174.5	10	48.9	1.478	29	228	9.766	16.3	21.4474	34.4828	1218.4	1011.83	1039.75	738.219	724.661	571.961	5304.82	1059.42	835.165	756.872	538.611	490.601	440.506	4121.18	158.974	176.669	282.883	199.608	234.06	131.455	1183.65	22.3127	1643.7	156.3	8.68333	250	2048	9	23	42.8571	11	5.6	0
9	1067	COHORT A	MIC1 - KO	Female	1661.6	25	157.6	16	42.6	2.498	41	200.2	13.522	14.2	21.2787	39.0244	1712.5	699.999	771.852	718.125	688.557	779.341	5370.37	1425.02	545.137	657.189	509.31	544.466	602.5	4283.62	287.479	154.862	114.663	208.815	144.091	176.841	1086.75	20.236	1615.5	184.5	10.25	280	2348	20	34	62.5	18	8.6	0
12	1074	COHORT A	MIC1 - KO	Female	1893.2	23	107.9	20	104.3	5.942	43	212.1	15.859	34.7667	49.1749	46.5116	1362.4	972.972	812.848	350.462	674.827	340.322	4513.84	1139.71	776.643	652.178	262.506	543.891	275.66	3650.59	222.698	196.328	160.67	87.956	130.937	64.6622	863.251	19.1246	1520.5	279.5	15.5278	235	2086	20	40	52.6316	15	8.7	0
8	1080	COHORT A	MIC1 - KO	Female	843.6	16	176.3	4	14.9	0.195	20	195.4	6.885	4.96667	7.62538	20	1561.31	1095.63	681.58	659.68	424.429	628.266	5050.89	1133.43	676.416	458.999	487.854	309.603	499.426	3565.73	427.878	419.213	222.581	171.827	114.826	128.84	1485.17	29.404	1601.9	198.1	11.0056	368	2359	14	23	66.6667	14	8.3	0
13	1061	COHORT B	MIC1 - KO	Female	1140	19	153.9	9	38.3	1.34	27	193.6	9.193	12.7667	19.7831	33.3333	1237.7	811.921	851.012	830.218	808.611	665.158	5204.62	904.424	579.814	553.878	582.947	522.88	452.599	3596.54	333.272	232.107	297.134	247.271	285.731	212.558	1608.07	30.897	1461	339	18.8333	381	2291	18	45	41.8605	18	8	0
16	1069	COHORT B	MIC1 - KO	Female	1396.9	22	163.2	13	54.9	2.779	33	223.7	11.845	18.3	24.5418	39.3939	1482.59	1177.36	1001.04	830.85	833.094	872.877	6197.81	1218.24	774.126	608.134	538.908	405.802	415.434	3960.65	264.342	403.233	392.908	291.942	427.292	457.443	2237.16	36.096	1389.9	410.1	22.7833	228	2414	26	43	63.4146	16	9.7	0
12	1078	COHORT B	MIC1 - KO	Female	1742.4	26	118.1	22	76.7	4.017	44	197.5	14.43	25.5667	38.8354	50	1918.57	1108.34	601.11	729.375	991.192	652.288	6000.88	1564.44	843.008	362.702	472.215	817.151	544.55	4604.07	354.134	265.334	238.408	257.159	174.041	107.738	1396.81	23.2768	1525.7	274.3	15.2389	281	2326	17	40	44.7368	7	4.1	0
18	1085	COHORT B	MIC1 - KO	Female	958.9	17	122.7	11	40.7	1.12	28	169	7.431	13.5667	24.0828	39.2857	1289.56	727.951	606.37	628.569	621.226	458.507	4332.18	1132.92	528.996	323.179	456.265	363.776	216.038	3021.17	156.643	198.955	283.191	172.304	257.45	242.469	1311.01	30.2621	1391.3	408.7	22.7056	184	2055	14	24	63.6364	18	14.3	2
16	1062	COHORT C	MIC1 - KO	Female	1445.6	24	159.3	10	41.2	2.224	34	209.3	11.94	13.7333	19.6847	29.4118	1303.86	590.489	624.198	440.442	572.681	555.893	4087.56	1095.62	436.765	389.559	294.642	232.925	321.332	2770.84	208.237	153.724	234.639	145.8	339.756	234.561	1316.72	32.2128	1508.9	291.1	16.1722	208	2156	19	31	65.5172	8	5.4	0
17	1068	COHORT C	MIC1 - KO	Female	498.2	10	227.1	0	0	0	10	227.3	4.34	0	0	0	709.485	588.649	578.09	484.597	504.827	491.263	3356.91	690.194	416.856	437.918	382.044	309.317	288.618	2524.95	19.2906	171.793	140.172	102.554	195.51	202.644	831.964	24.7836	1645	155	8.61111	179	2105	12	27	48	12	6.4	0
20	1075	COHORT C	MIC1 - KO	Female	656.4	15	183.1	2	2.7	0	18	194	5.061	0.9	1.39175	11.1111	1019.96	581.365	486.756	526.834	427.805	389.058	3431.78	812.296	380.438	348.585	338.017	227.639	206.864	2313.84	207.662	200.927	138.172	188.818	200.166	182.195	1117.94	32.5761	1531.4	268.6	14.9222	130	2044	8	23	38.0952	11	5.7	1
14	1079	COHORT C	MIC1 - KO	Female	1130.6	20	154.3	10	40.7	1.917	29	198	9.038	13.5667	20.5556	34.4828	1019.64	721.868	669.457	491.174	460.578	587.901	3950.62	868.792	464.904	408.557	307.492	293.984	362.387	2706.12	150.846	256.964	260.9	183.682	166.594	225.514	1244.5	31.5014	1469.6	330.4	18.3556	309	2307	12	23	57.1429	16	11.8	0
12	1081	COHORT C	MIC1 - KO	Female	1145.6	28	167.8	5	20.7	0.429	30	197.9	9.092	6.9	10.4598	16.6667	1613.26	862.074	879.871	702.953	739.367	649.347	5446.88	1307.29	661.046	495.455	474.115	510.51	376.833	3825.25	305.977	201.028	384.416	228.839	228.857	272.514	1621.63	29.7718	1472.1	327.9	18.2167	237	2231	14	31	48.2759	16	8.1	0
13	1082	COHORT C	MIC1 - KO	Female	1210	24	144.2	11	37.2	1.631	33	183.9	9.76	12.4	20.2284	33.3333	933.342	531.857	426.792	553.683	462.077	524.174	3431.92	884.917	438.985	291.465	350.297	311.583	349.906	2627.15	48.4245	92.8725	135.327	203.386	150.494	174.268	804.772	23.4496	1624	176	9.77778	128	2254	14	32	46.6667	13	8.6	0
6	21211	COHORT A	WT	Male	1342.1	24	179.9	7	37	1.781	29	224.7	11.581	12.3333	16.4664	24.1379	1599.29	1090.1	1051.7	782.907	782.3	713.152	6019.45	1211.6	786.491	720.869	499.184	558.597	423.469	4200.21	387.694	303.613	330.829	283.723	223.703	289.683	1819.24	30.2228	1530.6	269.4	14.9667	209	2464	19	28	73.0769	10	5	0
5	21218	COHORT A	WT	Male	676.9	12	254.2	1	2.7	0	13	263	5.985	0.9	1.02662	7.69231	1030.13	688.166	520.26	843.382	417.447	652.177	4151.56	944.796	524.727	442.511	614.597	313.973	413.695	3254.3	85.3298	163.439	77.7483	228.784	103.474	238.481	897.257	21.6125	1653	147	8.16667	314	2342	6	14	50	29	25.8	2
3	21227	COHORT A	WT	Male	991.5	20	178.2	4	27.4	0.694	23	213.2	8.061	9.13333	12.8518	17.3913	961.129	465.396	485.484	512.178	250.787	381.672	3056.65	686.604	302.324	337.882	310.97	186.584	264.032	2088.4	274.525	163.072	147.602	201.208	64.2026	117.639	968.249	31.6769	1607.9	192.1	10.6722	166	2195	11	26	45.8333	20	17.3	6
1	21216	COHORT B	WT	Male	1221.5	24	176.1	8	35.2	1.196	30	213.9	10.241	11.7333	16.4563	26.6667	1161.31	781.079	630.397	462.813	521.44	373.665	3930.7	914.1	532.425	453.898	326.568	427.66	263.871	2918.52	247.21	248.655	176.499	136.245	93.7796	109.794	1012.18	25.7507	1617.4	182.6	10.1444	226	2367	5	12	50	19	10.6	0
8	21220	COHORT B	WT	Male	1313.4	23	122.3	8	50.3	1.689	31	176.3	10.416	16.7667	28.5309	25.8065	1659.55	925.604	997.329	776.014	1013.46	382.527	5754.48	1413.32	653.895	729.738	596.248	817.755	325.686	4536.64	246.239	271.709	267.591	179.766	195.701	56.8406	1217.85	21.1634	1570.7	229.3	12.7389	297	2369	18	40	47.3684	31	24.7	2
5	21225	COHORT B	WT	Male	1032.7	19	208.3	2	6.1	0.077	19	219.5	8.915	2.03333	2.77904	10.5263	1092.49	749.807	823.123	687.82	562.64	632.518	4548.4	861.612	604.761	608.872	532.884	473.801	450.267	3532.2	230.878	145.046	214.251	154.936	88.8392	182.251	1016.2	22.342	1634.3	165.7	9.20556	358	2334	20	35	60.6061	9	6.7	5
3	21234	COHORT B	WT	Male	881.2	17	205.3	2	4.7	0.034	16	226.5	7.516	1.56667	2.07506	12.5	1008.73	383.379	511.538	467.225	159.041	408.717	2938.63	835.601	282.732	366.855	337.608	88.0844	364.862	2275.74	173.129	100.647	144.683	129.617	70.9565	43.8557	662.888	22.5577	1658.2	141.8	7.87778	85	1955	13	22	65	20	13.1	3
9	21212	COHORT C	WT	Male	1538.1	22	157.6	9	36.5	1.453	33	204	12.946	12.1667	17.8922	27.2727	1135.54	898.116	908.535	1037.12	826.972	1282.07	6088.35	1004.83	701.663	760.506	818.897	654.166	993.367	4933.43	130.705	196.453	148.029	218.225	172.806	288.698	1154.92	18.9693	1664.3	135.7	7.53889	246	2366	10	27	40	41	25	1
10	21213	COHORT C	WT	Male	731.7	13	226.5	3	10.3	0.083	11	251.4	6.477	3.43333	4.09706	27.2727	576.622	732.634	491.506	534.429	626.236	441.195	3402.62	552.457	554.233	429.383	451.502	498.089	367.033	2852.7	24.165	178.401	62.1236	82.9277	128.147	74.1614	549.926	16.1618	1658.2	141.8	7.87778	195	2315	12	34	37.5	13	8.2	3
2	21217	COHORT C	WT	Male	677	12	243.9	0	0	0	12	247.1	5.909	0	0	0	992.289	922.995	609.653	665.949	465.662	407.751	4064.3	824.063	719.133	512.764	500.904	326.111	307.793	3190.77	168.226	203.863	96.8894	165.044	139.55	99.9583	873.53	21.4928	1664.2	135.8	7.54444	211	2281	14	30	50	14	10.5	3
6	21221	COHORT C	WT	Male	999.7	19	189.9	5	24.5	0.677	22	225.4	8.674	8.16667	10.8696	22.7273	923.37	689.764	404.191	330.206	436.683	405.475	3189.69	807.307	556.719	314.91	291.423	376.319	264.3	2610.98	116.062	133.045	89.2813	38.7831	60.3642	141.176	578.711	18.1432	1677.9	122.1	6.78333	250	2321	8	20	44.4444	16	9.3	14
5	21226	COHORT C	WT	Male	1087.2	19	210.3	7	20.8	0.43	26	245.8	9.183	6.93333	8.46216	26.9231	1068.91	758.581	587.832	586.727	363.237	628.111	3993.4	893.385	502.099	408.822	447.97	230.57	459.04	2941.89	175.529	256.483	179.01	138.757	132.667	169.071	1051.52	26.3314	1582.4	217.6	12.0889	229	2483	12	36	35.2941	22	16.5	2
3	21235	COHORT C	WT	Male	1144.9	25	184.7	5	11	0.338	28	209.3	9.156	3.66667	5.25561	17.8571	1630.59	791.292	789.378	539.608	406.36	617.326	4774.55	1191.74	502.12	536.35	399.208	287.354	484.636	3401.41	438.847	289.172	253.027	140.4	119.006	132.689	1373.14	28.7596	1555.3	244.7	13.5944	241	2348	17	39	45.9459	18	14.6	9
4	1060	COHORT A	MIC1 - KO	Male	721.2	18	169.2	3	24.8	0.828	19	202.8	5.713	8.26667	12.2288	15.7895	866.752	622.991	668.29	601.684	394.769	548.932	3703.42	621.763	401.017	374.194	371.36	259.864	385.116	2413.31	244.989	221.974	294.096	230.324	134.905	163.816	1290.1	34.8355	1487.1	312.9	17.3833	272	2419	5	16	35.7143	21	19.1	4
1	1063	COHORT A	MIC1 - KO	Male	1104.5	21	157.6	5	28.4	0.819	26	189.5	8.764	9.46667	14.9868	19.2308	1190.3	608.51	700.742	379.509	421.63	461.192	3761.88	1023.57	422.584	496.549	222.029	186.624	334.499	2685.86	166.729	185.926	204.193	157.48	235.005	126.693	1076.03	28.6034	1456.8	343.2	19.0667	187	2318	8	14	66.6667	10	9.9	0
2	1064	COHORT A	MIC1 - KO	Male	1177.3	17	141.9	7	86.2	3.557	18	240.3	10.525	28.7333	35.8718	38.8889	1463.4	700.419	579.537	621.129	508.94	621.425	4494.85	1072.22	446.046	381.505	358.729	340.022	376.306	2974.83	391.172	254.373	198.033	262.4	168.918	245.118	1520.01	33.8168	1426.9	373.1	20.7278	267	2315	23	37	65.7143	17	12.4	0
9	1065	COHORT B	MIC1 - KO	Male	868	22	203	3	7.7	0.106	21	225.9	7.667	2.56667	3.40859	14.2857	985.925	952.489	568.465	532.361	495.678	246.9	3781.82	821.408	727.567	473.395	416.596	346.926	156.443	2942.34	164.516	224.922	95.0698	115.765	148.752	90.4568	839.482	22.1978	1611.2	188.8	10.4889	243	2324	15	29	55.5556	29	16.8	0
10	1066	COHORT B	MIC1 - KO	Male	660.9	10	139.5	7	43.5	1.057	17	185	5.403	14.5	23.5135	41.1765	705.842	440.269	326.436	410.76	385.891	459.925	2729.12	535.977	316.665	221.039	336.99	298.91	277.184	1986.77	169.864	123.604	105.396	73.7698	86.9809	182.74	742.356	27.2013	1659.7	140.3	7.79444	126	1884	12	20	66.6667	19	15.2	2
6	1070	COHORT B	MIC1 - KO	Male	1410.4	23	140.6	11	67.1	3.192	32	214.9	11.921	22.3667	31.2238	34.375	1168.02	652.279	748.041	545.019	494.277	538.981	4146.62	910.757	442.03	479.895	406.802	343.276	376.85	2959.61	257.266	210.248	268.145	138.217	151.001	162.131	1187.01	28.6259	1532.2	267.8	14.8778	284	2395	16	25	69.5652	14	11.8	7
7	1071	COHORT B	MIC1 - KO	Male	1065.9	21	162.2	8	53.4	1.755	29	216	8.896	17.8	24.7222	27.5862	1767.14	815.786	755.81	596.793	494.332	527.917	4957.78	1576.35	599.142	592.798	339.721	374.563	361.588	3844.16	190.798	216.644	163.012	257.073	119.769	166.329	1113.62	22.4621	1559.5	240.5	13.3611	294	2367	18	32	60	29	15.6	1
2	1076	COHORT B	MIC1 - KO	Male	1100.4	24	163.6	10	34.1	1.004	31	209.5	9.279	11.3667	16.2768	32.2581	2444.91	1486.57	1401.35	799.721	740.616	1011.25	7884.42	1793.24	957.371	991.861	551.688	642.082	766.514	5702.76	651.675	529.195	409.487	248.033	98.5338	244.736	2181.66	27.6705	1499.4	300.6	16.7	336	2381	23	57	41.8182	11	6	0
4	1083	COHORT B	MIC1 - KO	Male	1565.4	24	152.7	14	65.3	3.452	38	218.1	13.014	21.7667	29.9404	36.8421	2156.88	948.638	1066.11	1069.87	435.487	658.339	6335.33	1545.94	562.226	735.319	737.612	338.048	495.54	4414.69	610.939	386.413	330.794	332.262	97.4391	162.799	1920.65	30.3164	1471.7	328.3	18.2389	367	2358	23	49	48.9362	32	20.4	0
4	1072	COHORT C	MIC1 - KO	Male	1020.4	19	132	10	41.3	1.203	29	180	8.029	13.7667	22.9444	34.4828	1134.23	810.098	690.743	852.946	529.391	498.259	4515.67	906.619	601.048	534.407	531.626	288.967	279.261	3141.93	227.612	209.05	156.336	321.319	240.423	218.999	1373.74	30.4216	1504.2	295.8	16.4333	224	2529	9	29	33.3333	26	17.8	3
7	1073	COHORT C	MIC1 - KO	Male	1410.2	19	132	12	60.7	2.315	37	204.8	11.546	20.2333	29.6387	32.4324	1155.03	634.9	531.703	555.779	580.369	479.181	3936.96	964.165	433.145	318.284	430.116	452.475	277.604	2875.79	190.862	201.755	213.418	125.663	127.894	201.578	1061.17	26.9541	1374.8	425.2	23.6222	467	2480	16	32	53.3333	14	10.4	2
8	1077	COHORT C	MIC1 - KO	Male	1511.4	29	143.9	14	33.7	1.336	43	187.5	12.043	11.2333	17.9733	32.5581	1062	844.28	737.444	601.793	801.725	611.526	4658.76	882.707	633.76	559.569	446.564	573.895	324.444	3420.94	179.29	210.52	177.875	155.229	227.83	287.081	1237.82	26.5698	1532.8	267.2	14.8444	336	2630	16	34	50	19	11.3	2
1	1084	COHORT C	MIC1 - KO	Male	1486.2	29	167.9	13	23.9	0.728	41	201.6	11.775	7.96667	11.8552	31.7073	1567.42	1056.56	805.906	1009.16	680.044	578.788	5697.88	1202.94	649.598	485.141	676.343	511.777	327.883	3853.68	364.479	406.966	320.765	332.815	168.267	250.905	1844.2	32.3663	1449.2	350.8	19.4889	363	2645	20	33	64.5161	25	20.4	4
[truncated: 53 more columns]

## Sheet: Sheet1
1060	2013-01-29	1060	0
1061	2013-01-28	1061	0
1062	2013-01-28	1062	0
1063	2013-01-28	1063	0
1064	2013-01-28	1064	0
1065	2013-01-28	1065	0
1066	2013-01-28	1066	0
1067	2013-01-28	1067	0
1068	2013-01-28	1068	0
1069	2013-01-28	1069	0
1070	2013-02-01	1070	0
1071	2013-02-01	1071	0
1072	2013-02-01	1072	0
1073	2013-02-01	1073	0
1074	2013-02-01	1074	0
1075	2013-02-01	1075	0
1076	2013-02-04	1076	0
1077	2013-02-04	1077	0
1078	2013-02-04	1078	0
1079	2013-02-04	1079	0
1080	2013-02-04	1080	0
1081	2013-02-04	1081	0
1082	2013-02-04	1082	0
1083	2013-02-08	1083	0
1084	2013-02-08	1084	0
1085	2013-02-08	1085	0
21110	2013-02-03	21110	0
21117	2013-02-03	21117	0
21123	2013-02-03	21123	0
21124	2013-02-03	21124	0
21142	2013-02-03	21142	0
21143	2013-02-03	21143	0
21144	2013-02-03	21144	0
21145	2013-02-03	21145	0
21153	2013-02-03	21153	0
21154	2013-02-03	21154	0
21158	2013-02-03	21158	0
21166	2013-02-03	21166	0
21169	2013-02-03	21169	0
21211	2013-02-06	21211	0
21212	2013-02-06	21212	0
21213	2013-02-06	21213	0
21216	2013-02-05	21216	0
21217	2013-02-05	21217	0
21218	2013-02-05	21218	0
21220	2013-02-05	21220	0
21221	2013-02-05	21221	0
21225	2013-02-06	21225	0
21226	2013-02-06	21226	0
21227	2013-02-06	21227	0
21234	2013-02-05	21234	0
21235	2013-02-05	21235	0
